# Supplementary material for: Factors Associated With Nonadherence to Lung Cancer Screening Across Multiple Screening Time Points
Source: PubMed Central journal article supplement (PMC10214032; doi:10.1001/jamanetworkopen.2023.15250), 2023-05-25
Supplement: jamanetwopen-e2315250-s002.pdf [file jamanetwopen-e2315250-s002.pdf]

## Data Sharing Statement

Lin. Factors Associated With Nonadherence to Lung Cancer Screening Across Multiple Screening Time Points. *JAMA Netw Open*. Published May 25, 2023.

doi:10.1001/jamanetworkopen.2023.15250

### Data

**Data available:** No
